# Supplementary material for: Isolation and Characterization of Equine Uterine Extracellular Vesicles: A Comparative Methodological Study
Source: MDPI journal article supplement (doi:10.3390/ijms22020979), 2021-01-19
Supplement: s1 [file s1]

| Gene ID    | Gene Symbol  | Description                                     | Hsa gene ID | Hsa symbol | Description                         | RefSeq Protein Accession | MC_C/E_PBS_R1 | MC_C/E_PBS_R2 | MC_C/E_PBS_R3 | MC_C/E_PBS_R4 | MD_C/E_Tre_R1 | MD_C/E_Tre_R2 | MD_C/E_Tre_R3 | MD_C/E_Tre_R4 | MC_C/E_PBS_SN_R1 | MD_C/E_Tre_SN_R1 | ME_C/E_IzonUC_R2 | ME_C/E_IzonUC_R3 | ME_C/E_IzonUC_R4 | MC_C/E_PBS_R2 | MC_C/E_PBS_R3 | MC_C/E_PBS_R4 |
|------------|--------------|-------------------------------------------------|-------------|------------|-------------------------------------|--------------------------|---------------|---------------|---------------|---------------|---------------|---------------|---------------|---------------|------------------|------------------|------------------|------------------|------------------|---------------|---------------|---------------|
| 100061692  | A2M          | alpha-2-macroglobulin                           | 2           | A2M        | alpha-2-macroglobulin               | XP_001499173             | 2.00          | 2.00          | 2.00          | 6.67          | 2.00          | 6.83          | 7.24          | 8.33          | 8.10             | 8.43             | 2.00             | 2.00             | 8.87             | 8.18          | 2.00          | 11.38         |
| 100088225  | VCP          | valosin containing protein                      | 7415        | VCP        | valosin containing protein          | XP_023485358             | 10.52         | 11.81         | 10.07         | 10.50         | 9.86          | 10.70         | 9.58          | 10.30         | 2.00             | 2.00             | 11.19            | 10.77            | 10.95            | 12.51         | 12.45         | 10.88         |
| 100053810  | MMP26        | matrix metalloproteinase 26                     | 56547       | MMP26      | matrix metalloproteinase 26         | XP_001503575             | 7.34          | 7.31          | 7.62          | 5.30          | 7.12          | 6.26          | 6.29          | 2.00          | 2.00             | 6.30             | 2.00             | 8.05             | 7.59             | 2.00          | 9.42          | 8.05          |
| 100094109  | HBB          | hemoglobin, beta                                | 3043        | HBB        | hemoglobin subunit beta             | NP_001151490             | 6.79          | 6.70          | 2.00          | 4.36          | 6.94          | 7.75          | 3.92          | 5.04          | 8.87             | 10.98            | 8.93             | 8.25             | 10.25            | 8.37          | 9.97          | 10.47         |
| 100053541  | MME          | membrane metalloendopeptidase                   | 4311        | MME        | membrane metalloendopeptidase       | XP_023476917.XP          | 10.39         | 10.57         | 10.39         | 8.71          | 10.50         | 9.54          | 9.63          | 8.17          | 7.02             | 7.60             | 11.31            | 11.59            | 12.42            | 10.38         | 11.96         | 11.85         |
| 100067672  | VNN2         | vanin 2                                         | 8875        | VNN2       | vanin 2                             | XP_023506881             | 8.30          | 2.00          | 5.65          | 2.00          | 9.45          | 5.68          | 6.83          | 2.00          | 9.38             | 8.89             | 11.41            | 2.00             | 10.50            | 9.02          | 8.84          | 10.67         |
| 100054071  | STC1         | stanniocalcin 1                                 | 6781        | STC1       | stanniocalcin 1                     | XP_001493245             | 7.45          | 5.52          | 6.34          | 2.00          | 7.71          | 7.01          | 6.98          | 2.00          | 10.33            | 9.76             | 2.00             | 2.00             | 2.00             | 2.00          | 8.45          | 8.80          |
| 1111772846 | LOC111772846 | alcohol dehydrogenase class-3                   | 128         | ADH5       | alcohol dehydrogenase 5 (class II)  | XP_023493440             | 7.94          | 2.00          | 7.71          | 2.00          | 7.94          | 8.21          | 2.00          | 7.80          | 2.00             | 2.00             | 2.00             | 2.00             | 2.00             | 9.14          | 10.31         | 2.00          |
| 100058677  | CYSRT1       | cysteine rich tail 1                            | 375791      | CYSRT1     | cysteine rich tail 1                | XP_023486229             | 2.00          | 2.00          | 2.00          | 2.00          | 8.46          | 7.26          | 2.00          | 2.00          | 2.00             | 2.00             | 8.86             | 10.00            | 2.00             | 2.00          | 2.00          | 2.00          |
| Gene ID    | Gene Symbol  | Description                                     | Hsa gene ID | Hsa symbol | Description                         | RefSeq Protein Accession | MC_C/E_PBS_R1 | MC_C/E_PBS_R2 | MC_C/E_PBS_R3 | MC_C/E_PBS_R4 | MD_C/E_Tre_R1 | MD_C/E_Tre_R2 | MD_C/E_Tre_R3 | MD_C/E_Tre_R4 | MC_C/E_PBS_SN_R1 | MD_C/E_Tre_SN_R1 | ME_C/E_IzonUC_R2 | ME_C/E_IzonUC_R3 | ME_C/E_IzonUC_R4 | MC_C/E_PBS_R2 | MC_C/E_PBS_R3 | MC_C/E_PBS_R4 |
| 100034189  | FN1          | fibronectin 1                                   | 2335        | FN1        | fibronectin 1                       | XP_023498053.XP          | 9.49          | 10.26         | 11.08         | 9.09          | 8.50          | 10.08         | 10.69         | 9.41          | 7.51             | 7.78             | 8.80             | 11.43            | 10.79            | 11.79         | 12.10         | 12.52         |
| 100034213  | P19          | lipocalin                                       | 3934        | LCN2       | lipocalin 2                         | NP_001075978             | 9.82          | 10.03         | 10.69         | 8.87          | 9.88          | 10.24         | 10.58         | 10.17         | 12.54            | 12.38            | 2.00             | 9.70             | 8.23             | 2.00          | 10.66         | 10.30         |
| 100062154  | MTHFD1       | methylene tetrahydrofolate dehydrogenase, cy    | 4522        | MTHFD1     | methylene tetrahydrofolate dehyd    | XP_001499181             | 2.00          | 6.24          | 5.78          | 7.54          | 6.84          | 7.34          | 6.18          | 7.36          | 2.00             | 2.00             | 8.53             | 7.81             | 8.58             | 9.72          | 8.60          | 2.00          |
| 100029603  | JCHAIN       | joining chain of multimeric IgA and IgM         | 3512        | JCHAIN     | joining chain of multimeric IgA an  | XP_001217464             | 10.58         | 11.20         | 11.16         | 11.37         | 10.77         | 10.78         | 11.27         | 11.26         | 8.75             | 8.82             | 13.43            | 12.79            | 13.04            | 13.59         | 13.98         | 14.34         |
| 100084107  | CALR         | calreticulin                                    | 811         | CALR       | calreticulin                        | XP_001504502             | 9.50          | 9.03          | 8.66          | 8.39          | 9.51          | 9.05          | 9.72          | 8.41          | 5.46             | 5.89             | 10.69            | 9.99             | 10.30            | 11.56         | 10.46         | 10.58         |
| 100033887  | GAPDH        | glyceraldehyde-3-phosphate dehydrogenase        | 2597        | GAPDH      | glyceraldehyde-3-phosphate dehy     | NP_001151328             | 9.88          | 10.41         | 9.68          | 10.57         | 9.67          | 9.94          | 8.90          | 10.28         | 8.07             | 8.12             | 11.43            | 11.33            | 11.36            | 11.81         | 12.44         | 11.30         |
| 100089931  | FURIN        | furin, paired basic amino acid cleaving enzy    | 5045        | FURIN      | furin, paired basic amino acid clea | XP_023505390             | 10.29         | 10.39         | 9.48          | 9.09          | 10.01         | 10.10         | 9.23          | 8.77          | 2.00             | 2.00             | 11.46            | 12.72            | 12.96            | 10.81         | 12.85         | 11.78         |
| 100033337  | HSP90AA1     | heat shock protein 90 alpha family class A m    | 2320        | HSP90AA1   | heat shock protein 90 alpha family  | XP_023483460             | 2.00          | 2.00          | 2.00          | 2.00          | 2.00          | 2.00          | 2.00          | 2.00          | 6.49             | 6.99             | 9.35             | 9.93             | 2.00             | 9.21          | 8.74          | 2.00          |
| 100034206  | ALB          | albumin                                         | 3130        | ALB        | albumin                             | NP_001075972             | 7.15          | 7.46          | 7.45          | 7.96          | 6.59          | 7.83          | 7.44          | 7.62          | 12.80            | 12.65            | 10.86            | 9.41             | 12.74            | 10.62         | 8.71          | 11.33         |
| 100055819  | ECM2         | extracellular matrix protein 2                  | 1842        | ECM2       | extracellular matrix protein 2      | XP_023483400             | 10.65         | 10.78         | 9.70          | 9.53          | 10.52         | 11.61         | 10.33         | 9.01          | 8.60             | 8.48             | 11.55            | 12.15            | 11.07            | 10.53         | 11.27         | 10.59         |
| 100055853  | CLIC1        | chloride intracellular channel 1                | 1192        | CLIC1      | chloride intracellular channel 1    | XP_014589790             | 11.27         | 11.05         | 11.34         | 10.47         | 10.77         | 11.21         | 11.23         | 10.24         | 9.50             | 8.81             | 13.18            | 13.19            | 14.18            | 12.69         | 12.36         | 12.72         |
| 100070995  | TPPI         | trypsin/lyl peptidase 1                         | 1200        | TPPI       | trypsin/lyl peptidase 1             | XP_023501673             | 8.13          | 2.00          | 7.42          | 7.23          | 8.11          | 8.15          | 7.27          | 7.25          | 5.79             | 5.55             | 10.17            | 10.78            | 10.15            | 9.06          | 9.53          | 8.89          |
| 10006144   | BAGLT3       | beta-1,4-galactosyltransferase 3                | 8703        | BAGLT3     | beta-1,4-galactosyltransferase 3    | XP_023496966             | 9.70          | 10.10         | 9.07          | 7.52          | 9.27          | 9.42          | 9.06          | 6.43          | 2.00             | 2.00             | 10.22            | 11.26            | 9.95             | 2.00          | 10.86         | 8.93          |
| 111772887  | LOC111772887 | deleted in malignant brain tumors 1 protein-lik | 1755        | DMBT1      | deleted in malignant brain tumors   | XP_023493734             | 2.00          | 8.04          | 7.07          | 8.60          | 2.00          | 7.87          | 7.41          | 8.91          | 5.61             | 2.00             | 11.38            | 12.81            | 10.66            | 9.23          | 12.22         | 9.31          |
| 100147201  | EPSSB1       | EPSSB like 1                                    | 54689       | EPSSB1     | EPSSB like 1                        | XP_023506210             | 6.63          | 6.32          | 6.57          | 2.00          | 6.98          | 6.05          | 6.99          | 2.00          | 2.00             | 2.00             | 10.31            | 10.09            | 9.88             | 8.85          | 8.76          | 2.00          |
| 100054320  | ANXA2        | annexin A2                                      | 302         | ANXA2      | annexin A2                          | XP_023492402             | 2.00          | 2.00          | 2.00          | 2.00          | 2.00          | 2.00          | 2.00          | 2.00          | 4.90             | 4.96             | 11.45            | 11.01            | 2.00             | 9.80          | 9.35          | 2.00          |
| 100056503  | F5           | coagulation factor V                            | 2153        | F5         | coagulation factor V                | XP_023496285             | 7.32          | 7.03          | 7.13          | 7.07          | 7.45          | 6.97          | 6.71          | 2.00          | 6.70             | 6.50             | 2.00             | 10.01            | 10.93            | 2.00          | 7.63          | 10.10         |
| 100050531  | PLG          | plasminogen                                     | 5340        | PLG        | plasminogen                         | XP_014593633             | 2.00          | 2.00          | 9.12          | 7.03          | 2.00          | 7.42          | 8.65          | 6.32          | 2.00             | 2.00             | 2.00             | 2.00             | 8.14             | 9.82          | 2.00          | 10.03         |
| 100068724  | IQGA1        | IQ motif containing GTPase activating protei    | 8826        | IQGA1      | IQ motif containing GTPase activ    | XP_023505306.XP          | 9.33          | 8.30          | 8.95          | 9.19          | 8.42          | 9.57          | 8.66          | 8.62          | 6.59             | 2.00             | 11.05            | 10.06            | 11.53            | 2.00          | 2.00          | 9.37          |
| 102147792  | MUC5B        | mucin 5B, oligomeric mucus/gel-forming          | 727897      | MUC5B      | mucin 5B, oligomeric mucus/gel-f    | XP_023510736             | 2.00          | 6.46          | 2.00          | 6.61          | 2.00          | 6.46          | 2.00          | 6.53          | 2.00             | 2.00             | 9.91             | 12.53            | 2.00             | 2.00          | 9.44          | 2.00          |
| 100054482  | MYH9         | myosin heavy chain 9                            | 4627        | MYH9       | myosin heavy chain 9                | XP_023487015             | 6.40          | 5.27          | 6.11          | 8.02          | 6.35          | 6.79          | 2.00          | 8.00          | 2.00             | 2.00             | 9.03             | 8.62             | 8.23             | 2.00          | 2.00          | 2.00          |
| 10006142   | SDF4         | stromal cell derived factor 4                   | 51150       | SDF4       | stromal cell derived factor 4       | XP_023491823             | 2.00          | 4.32          | 2.00          | 2.00          | 3.33          | 2.00          | 2.00          | 2.00          | 2.00             | 2.00             | 10.08            | 10.67            | 10.72            | 2.00          | 10.44         | 2.00          |
| 100086209  | BAGALT1      | beta-1,4-galactosyltransferase 1                | 2683        | BAGALT1    | beta-1,4-galactosyltransferase 1    | XP_023483236             | 2.00          | 2.00          | 6.21          | 2.00          | 5.53          | 4.84          | 5.59          | 2.00          | 2.00             | 2.00             | 9.00             | 9.97             | 2.00             | 6.79          | 2.00          | 2.00          |
| 100052421  | PRDX1        | peroxiredoxin 1                                 | 5052        | PRDX1      | peroxiredoxin 1                     | XP_00507147              | 2.00          | 2.00          | 2.00          | 7.34          | 2.00          | 7.15          | 2.00          | 8.56          | 6.75             | 7.24             | 10.20            | 10.17            | 2.00             | 9.11          | 2.00          | 2.00          |
| 100074502  | UNC5CL       | unc-5 family C-terminal like                    | 222643      | UNC5CL     | unc-5 family C-terminal like        | XP_023490664             | 2.00          | 5.89          | 6.40          | 6.45          | 2.00          | 5.65          | 2.00          | 2.00          | 2.00             | 2.00             | 9.01             | 8.26             | 9.42             | 2.00          | 2.00          | 7.83          |
| 100071467  | CLIC4        | chloride intracellular channel 4                | 25932       | CLIC4      | chloride intracellular channel 4    | XP_023491248             | 2.00          | 2.00          | 2.00          | 2.00          | 2.00          | 2.00          | 2.00          | 2.00          | 2.00             | 2.00             | 7.95             | 7.79             | 2.00             | 2.00          | 2.00          | 6.49          |
| 100053824  | SLC6A14      | solute carrier family 6 member 14               | 11254       | SLC6A14    | solute carrier family 6 member 14   | XP_001488209             | 2.00          | 2.00          | 2.00          | 2.00          | 2.00          | 2.00          | 2.00          | 2.00          | 2.00             | 2.00             | 6.36             | 7.14             | 2.00             | 2.00          | 2.00          | 2.00          |
| 100072548  | CTNNA1       | catenin alpha 1                                 | 1495        | CTNNA1     | catenin alpha 1                     | XP_023473380             | 2.00          | 2.00          | 7.09          | 7.97          | 2.00          | 6.91          | 2.00          | 6.83          | 2.00             | 2.00             | 8.76             | 2.00             | 2.00             | 2.00          | 2.00          | 2.00          |
| 100071956  | COTL1        | coactosin like F-actin binding protein 1        | 23406       | COTL1      | coactosin like F-actin binding prot | XP_001499912             | 2.00          | 2.00          | 2.00          | 2.00          | 2.00          | 2.00          | 2.00          | 2.00          | 2.00             | 4.93             | 8.86             | 9.16             | 10.08            | 2.00          | 2.00          | 2.00          |
| 100051013  | TUBB8        | tubulin beta class I                            | 203068      | TUBB8      | tubulin beta class I                | XP_001491228             | 2.00          | 2.00          | 2.00          | 7.44          | 2.00          | 2.00          | 2.00          | 2.00          | 2.00             | 2.00             | 10.11            | 9.46             | 9.23             | 2.00          | 2.00          | 2.00          |
| 100051365  | EVPL         | evoplakin                                       | 2125        | EVPL       | evoplakin                           | XP_023507755             | 2.00          | 2.00          | 2.00          | 2.00          | 2.00          | 2.00          | 2.00          | 2.00          | 2.00             | 2.00             | 9.26             | 8.21             | 2.00             | 2.00          | 2.00          | 2.00          |
| 100064004  | TBC1D10A     | TBC1 domain family member 10A                   | 83874       | TBC1D10A   | TBC1 domain family member 10A       | XP_023502630.XP          | 2.00          | 2.00          | 2.00          | 2.00          | 2.00          | 2.00          | 2.00          | 2.00          | 2.00             | 2.00             | 4.38             | 2.00             | 7.51             | 2.00          | 2.00          | 2.00          |
| 100050482  | RNH1         | ribonuclease/angiogenin inhibitor 1             | 6050        | RNH1       | ribonuclease/angiogenin inhibitor   | XP_023510598             | 2.00          | 2.00          | 2.00          | 2.00          | 3.81          | 2.00          | 2.00          | 2.00          | 2.00             | 2.00             | 6.79             | 2.00             | 7.63             | 2.00          | 2.00          | 2.00          |
| Gene ID    | Gene Symbol  | Description                                     | Hsa gene ID | Hsa symbol | Description                         | RefSeq Protein Accession | MC_C/E_PBS_R1 | MC_C/E_PBS_R2 | MC_C/E_PBS_R3 | MC_C/E_PBS_R4 | MD_C/E_Tre_R1 | MD_C/E_Tre_R2 | MD_C/E_Tre_R3 | MD_C/E_Tre_R4 | MC_C/E_PBS_SN_R1 | MD_C/E_Tre_SN_R1 | ME_C/E_IzonUC_R2 | ME_C/E_IzonUC_R3 | ME_C/E_IzonUC_R4 | MC_C/E_PBS_R2 | MC_C/E_PBS_R3 | MC_C/E_PBS_R4 |
| 100067589  | LOC10067589  | N-acetyllactosaminide alpha-1,3-galactosyltra   | 14594       | Ggfat1     | glycoprotein galactosyltransferase  | XP_023484568             | 8.52          | 7.28          | 8.65          | 6.70          | 8.57          | 2.00          | 8.60          | 6.02          | 2.00             | 2.00             | 2.00             | 2.00             | 9.90             | 2.00          | 8.96          | 9.92          |
| 100051840  | TUBA1A       | tubulin alpha 1a                                | 7846        | TUBA1A     | tubulin alpha 1a                    | XP_001504224             | 6.98          | 6.90          | 2.00          | 2.00          | 6.20          | 6.84          | 5.79          | 7.16          | 2.00             | 2.00             | 5.79             | 6.56             | 2.00             | 2.00          | 2.00          | 2.00          |
| 100082583  | APOA1        | apolipoprotein A1                               | 335         | APOA1      | apolipoprotein A1                   | XP_005611649             | 6.51          | 6.64          | 6.52          | 2.00          | 7.47          | 7.15          | 6.93          | 2.00          | 8.67             | 8.93             | 2.00             | 2.00             | 8.69             | 2.00          | 2.00          | 9.39          |
| 100052735  | HNRNPK       | heterogeneous nuclear ribonucleoprotein K       | 3190        | HNRNPK     | heterogeneous nuclear ribonucleo    | XP_003364038             | 2.00          | 7.23          | 2.00          | 7.82          | 2.00          | 8.52          | 7.63          | 8.07          | 2.00             | 2.00             | 2.00             | 9.11             | 2.00             | 9.37          | 9.26          | 2.00          |
| 100070060  | MUC4         | mucin-4                                         | 4585        | MUC4       | mucin 4, cell surface associated    | XP_023479343.XP          | 6.06          | 8.07          | 7.74          | 8.89          | 6.53          | 8.69          | 9.35          | 9.38          | 2.00             | 2.00             | 10.77            | 12.41            | 9.55             | 10.87         | 11.77         | 9.84          |
| 102150140  | SMIM22       | small integral membrane protein 22              | 440335      | SMIM22     | small integral membrane protein 2   | XP_005599043             | 2.00          | 5.94          | 2.00          | 5.68          | 2.00          | 6.75          | 5.59          | 6.54          | 2.00             | 2.00             | 7.84             | 9.05             | 2.00             | 7.52          | 8.87          | 2.00          |
| 100462689  | SERPINA14    | serpin peptidase inhibitor clade A (alpha-1 ant | 12          | SERPINA14  | serpin family A member 3            | XP_014591983             | 8.55          | 7.27          | 10.04         | 7.71          | 9.25          | 9.41          | 9.99          | 8.79          | 6.38             | 6.78             | 2.00             | 9.63             | 11.17            | 8.07          | 10.77         | 10.49         |
| 100629766  | MUC16        | mucin 16, cell surface associated               | 94025       | MUC16      | mucin 16, cell surface associated   | XP_023501276             | 6.16          | 2.00          | 2.00          | 2.00          | 6.34          | 6.24          | 6.28          | 2.00          | 2.00             | 2.00             | 8.47             | 8.77             | 8.95             | 2.00          | 8.50          | 8.97          |
| 100054410  | DPSYL2       | dihydrop                                        |             |            |                                     |                          |               |               |               |               |               |               |               |               |                  |                  |                  |                  |                  |               |               |               |
